# Supplementary material for: BRCA1 Promoter Methylation Is Linked to Defective Homologous Recombination Repair and Elevated miR-155 to Disrupt Myeloid Differentiation in Myeloid Malignancies
Source: Oxford University Press journal article supplement (doi:10.1158/1078-0432.ccr-18-0179), 2019-01-28
Supplement: 10780432ccr180179-sup-195624_3_supp_5223039_pjpgf8.docx [file 10780432ccr180179-sup-195624_3_supp_5223039_pjpgf8.docx]

Supplementary Table S1. Primer sequences for qMSP, MSP, RT-qPCR.

| qMSP | Primer sequence 5'-3' | |  |  | Tm |
| --- | --- | --- | --- | --- | --- |
| *BRCA1* |  |  |  |  | 64oC |
| methylated sense | GGGTGGTTAATTTAGAGTTTCGAGAGACG | | | |  |
| methylated antisense | AACGAACTCACGCCGCGCAATCG | | |  |  |
|  |  |  |  |  |  |
| *Actin* |  |  |  |  | 64oC |
| sense | TAGGGAGTATATAGGTTGGGGAAGTT | | |  |  |
| antisense | AACACACAATAACAAACACAAATTCAC | | |  |  |
|  |  |  |  |  |  |
| MSP | **Primer sequence 5'-3'** | |  |  | **Tm** |
| *FANC-C* |  |  |  |  | 60oC |
| unmethylated sense | TGTTGTTGTAATTTTGTTTTTGTTGGGGTTTTTG | | | |  |
| unmethylated antisense | AACACAACCAAAACTCTAACAAAAATAAACCCA | | | |  |
| methylated sense | GACCAAAACTCTAACGAAAATAAACCCG | | |  |  |
| methylated antisense | TTGTTGTAATTTTGTTTTCGTCGGGGTTTTC | | | |  |
|  |  |  |  |  |  |
| *FANC-L* |  |  |  |  | 64oC |
| unmethylated sense | TTTTATTATTGGTTGGGGAGTTTTGATGTTGTTTTTTGTAGAGTG | | | | |
| unmethylated antisense | AACTCTAAACCTACTAAATCCTACACATACACAATCCACTAACA | | | |  |
| methylated sense | TTGGGGAGTTTTGATGTCGTTTTTCGTAGAGC | | | |  |
| methylated antisense | CTCTAAACCTACTAAATCCTACACATACGCAATCCGCTAACG | | | |  |
|  |  |  |  |  |  |
| *FANC-F* |  |  |  |  | 62oC |
| unmethylated sense | TATGTTAGTATTTGGGATTTTGTTATTGTGTGTTG | | | |  |
| unmethylated antisense | CTAATTATACAACCACCACTCCAAAACCATACA | | | |  |
| methylated sense | TATTTGGGATTTCGTTATCGTGCGTC | | |  |  |
| methylated antisense | CGCCGCTCCAAAACCGTACG | | |  |  |
|  |  |  |  |  |  |
| *BRCA2* |  |  |  |  | 64oC |
| unmethylated sense | TGATTTTTGGGTGGTGTGTGTGTTGTG | | |  |  |
| unmethylated antisense | CAAAAACACAACAATACCACAACAACTCCA | | | |  |
| methylated sense | TTTTCGGGTGGTGCGTGTGTTGCG | | |  |  |
| methylated antisense | CGCAACAATACCACAACGACTCCG | | |  |  |
|  |  |  |  |  |  |
| *FANC-N* |  |  |  |  | 62oC |
| unmethylated sense | GATTTTGGTTATTTTTGGTTGTTTTTTTATTTTTG | | | |  |
| unmethylated antisense | AACCATAAACAACCAAACAATAAAACAAAACCA | | | |  |
| methylated sense | ATTTCGGTTATTTTCGGTCGTTTTTTTATTTTC | | | |  |
| methylated antisense | GACCGAACAATAAAACGAAACCG | | | |  |
|  |  |  |  |  |  |
| *ATM* |  |  |  |  |  |
| unmethylated sense | TAGGTGTGTTTGTTTTGATGGGTTG | | |  | 62oC |
| unmethylated antisense | AACAACCACAAAACACAATATACCCATACA | | | |  |
| methylated sense | CGTTTGTTTCGACGGGTC | |  |  |  |
| methylated antisense | CGCAAAACAGATATACCCATACG | | |  |  |
|  |  |  |  |  |  |
| *FANC-A* |  |  |  |  | 62oC |
| unmethylated sense | TAGGTGTTTTTTTTAGGATTAATATGGTTATGATG | | | |  |
| unmethylated antisense | CAAACACACACACCCATTAACTAACAACA | | |  |  |
| methylated sense | GGCGTTTTTTTTAGGATTAATATGGTTACGAC | | | |  |
| methylated antisense | CACACCCGTTAACTAACGACG | | |  |  |
|  |  |  |  |  |  |
| *BLOOM* |  |  |  |  | 62oC |
| unmethylated sense | GAAGTAGTTAATTGGAATAGGTAAGTTTTTGGTG | | | |  |
| unmethylated antisense | CCTCACACACAAACTCCTAACAAACA | | | |  |
| methylated sense | TAGTTAATCGGAATAGGTAAGTTTTCGGC | | | |  |
| methylated antisense | CACGCAAACTCCTAACGAACG | | | |  |
|  |  |  |  |  |  |
| *FANC-D2* |  |  |  |  | 64oC |
| unmethylated sense | GTGAGTTTTTTTTTATTGGGGTGTAGTTGTTTTTTTTTGATGTTG | | | |  |
| unmethylated antisense | CTCACCACTACAACAAAATTCTATACTAACCAAACATAAAAACA | | | |  |
| methylated sense | GAGTTTTTTTTTATCGGGGCGTAGTTGTTTTTTTTTGACGTC | | | |  |
| methylated antisense | TCACCGCTACAACAAAATTCTATACTAACCGAACATAAAAACG | | | |  |
|  |  |  |  |  |  |
| *FANC-E* |  |  |  |  | 62oC |
| unmethylated sense | TTGGTTTTATGTTTAGGTTTTGTTTTTGGTTGTG | | | |  |
| unmethylated antisense | CTATTACAAACTCTCCTCAACATTAAAAAACCA | | | |  |
| methylated sense | TTTAGGTTTCGTTTTCGGTCGC | | | |  |
| methylated antisense | TCTCCTCGACGTTAAAAAACCG | | | |  |
|  |  |  |  |  |  |
| *FANC-G* |  |  |  |  | 62oC |
| unmethylated sense | TTTGTTTATTTTTTTTTGAGGTTGTGGTTTTTGTG | | | |  |
| unmethylated antisense | CAAACAAACTTAAACAAACTAAAAACCAAAATCA | | | |  |
| methylated sense | GTTTATTTTTTTTCGAGGTTGTGGTTTTCGC | | | |  |
| methylated antisense | AAACAAACTTAAACGAACTAAAAACCGAAATCG | | | |  |
|  |  |  |  |  |  |
| *FANC-I* |  |  |  |  | 62oC |
| unmethylated sense | TGTTTTTTTTTGATTGTGAGTTGGGATGTTTTTG | | | |  |
| unmethylated antisense | ACTTCCACCATCCAAATACCTACAAACA | | | |  |
| methylated sense | TTTTTTTTCGATTGTGAGTTGGGACGTTTTC | | | |  |
| methylated antisense | CCGTCCGAATACCTACGAACG | | | |  |
|  |  |  |  |  |  |
| *FANC-J* |  |  |  |  | 62oC |
| unmethylated sense | GGATTTGTTGGAGTGGTGATAATTTTTTGTTGTG | | | |  |
| unmethylated antisense | AATCCCAATACAAAATAAAAAAACAAAAACTTCA | | | |  |
| methylated sense | AGTGGCGATAATTTTTCGTCGC | | | |  |
| methylated antisense | CCGATACGAAATAAAAAAACGAAAACTTCG | | | |  |
|  |  |  |  |  |  |
| *ATR* |  |  |  |  | 58oC |
| unmethylated sense | GTTTGGTGTTGAGAAAGAAGTTTGATGTGATTTG | | | |  |
| unmethylated antisense | TTCTACATAAAACCCAAAAAAAACCAAAAAACCA | | | |  |
|  |  |  |  |  |  |
| methylated sense | TGTTGAGAAAGAAGTTTGACGCGATTC | | | |  |
| methylated antisense | TACATAAAACCCGAAAAAAACCGAAAAACCG | | | |  |
|  |  |  |  |  |  |
| RT-qPCR | **Primer sequence 5'-3'** | |  |  | **Tm** |
| *BRCA1* |  |  |  |  | 60oC |
| sense | CAACATGCCCACAGATCAAC | | |  |  |
| *antisense* | ATGGAAGCCATTGTCCTCTG | | |  |  |
| GAPDH |  |  |  |  | 60oC |
| sense | GAAGGTCGGAGTCAACGGATTT | | |  |  |
| *antisense* | ATGGGTGGAATCATATTGGAAC | | |  |  |
